# Supplementary material for: Pangenome analysis uncovers large hidden structural variants underlying fruit color and bacterial wilt resistance in eggplant
Source: Research Square preprint supplement (doi:10.21203/rs.3.rs-5083502/v1), 2024-10-04
Supplement: Supplementary file 1 [file 57c4095f6629e754ac831937.xlsx]

## Sheet: Contents
Supplementary Table 1. Summary of 201 eggplant germplasms for whole genome re-sequencing.
Supplementary Table 2. Genome assembly and annotation statistics of the 9 assembled genomes.
Supplementary Table 3. Gene ontology (GO) enrichment in defense-related terms of 14 eggplant genomes.
Supplementary Table 4: The number of structural variants identified between S076 and each of the other 12 eggplant accessions using the pairwise whole-genome alignment method.
Supplementary Table 5: The coordinates (according to S076) of large inversions (approximately 5 Mb or larger) that are segregating within the eggplant population identified in our sample.
Supplementary Table 6: The number of the derived variants inferred using S098 as the outgroup.
Supplementary Table 7: Differential gene expression between fruit altered
Supplementary Table 8 Genotypes of Inversion and InDel associated with fruit color.
Supplementary Table 9. Candidate genes and variations associated with fruit color identified by SNP-GWAS, InDel-GWAS, and SV-GWAS.
Supplementary Table 10. Genes previously reported associated with anthocyanin synthesis in eggplant
Supplementary Table 11. The bacterial wilt incidence rate in 197 eggplant accessions in 2022 and 2023.
Supplementary Table 12. Variants and candidate genes associated with bacterial wilt resistance.
Supplementary Table 13. Candidate EPS1 and Roq1-like homologs in nine genomes.
Supplementary Table 14. Genes previously reported associated with bacterial wilt resistance in eggplant.
Supplementary Table 15. Primers used for cloning, qRT-PCR, VIGS, and overexpression.

## Sheet: TableS1
Supplementary Table 1. Summary of the 201 eggplant germplasms for whole genome re-sequencing
Sample ID	Alternative sample name	Name	Species	Location	Populaiton	Depth of sequencing	Total bases (Gb)	Raw read pairs	Clean read pairs	Clean rate (%)	PC1	PC2	PC3
S001	21245	Purple King	Solanum melongena	Malaysia	C1	22.7977	26.7343	91700607	90157744	98.3175	0.090061	-0.217364	0.0659319
S002	21246	Giant Ball	Solanum melongena	Malaysia	C1	22.3386	26.1959	89667944	87940038	98.073	0.068304	-0.21739	0.0517697
S003	21247	NN.17	Solanum melongena	Vietnam	C1	19.9396	23.3827	80294362	78696743	98.0103	0.0668674	-0.194049	0.0332476
S004	21248	325 Doree	Solanum melongena	Malaysia	C1	17.9355	21.0325	71924581	70709341	98.3104	0.0408036	-0.0709634	0.0384016
S005	21249	18K-20200	Solanum melongena	Guangzhou, Guangdong, China	C2	21.1565	24.8096	84809384	83702483	98.6948	-0.0304707	0.0103184	-0.0548925
S006	21250	Round Purple311	Solanum melongena	Malaysia	C1	18.2972	21.4567	73253690	72106508	98.434	0.0953213	0.0528863	-0.172199
S007	21252	21252	Solanum aethiopicum	Qingyuan, Guangdong, China	C1	26.1443	30.6588	105118402	103667998	98.6202	0.113241	-0.0612246	-0.138275
S008	21253	Qie Zhen-1-20012	Solanum melongena	Maoming, Guangdong, China	C1	24.3646	28.5717	97856088	96615081	98.7318	0.0513682	-0.00470831	-0.051533
S009	21254	White big eggplant	Solanum melongena	Thailand	C1	20.9769	24.5991	84104571	82997002	98.6831	-0.00515206	-0.0553017	0.000318344
S010	21255	Small oval purple	Solanum melongena	Thailand	C1	16.7943	19.6943	67427645	66179033	98.1482	-0.0108385	-0.0399531	-0.000133565
S011	21256	Long white	Solanum melongena	Thailand	C1	19.921	23.3609	80305875	78923427	98.2785	0.193588	0.164538	0.149917
S012	21257	5806-1	Solanum melongena	Unknown	C3	17.7698	20.8381	71484391	69934012	97.8312	-0.0439594	-0.0097381	0.015834
S013	21258	6B1-3-1B	Solanum melongena	Guangzhou, Guangdong, China	C2	17.9877	21.0936	72107450	70836794	98.2378	0.00190115	0.029541	-0.0265541
S014	21259	Purple big eggplant	Solanum melongena	Thailand	C1	20.4739	24.0092	82361017	81055707	98.4151	0.024029	-0.0508844	0.00794594
S015	21260	PD 77	Solanum melongena	Vietnam	C1	18.607	21.82	75182965	73505890	97.7693	0.0528253	-0.0439656	-0.105298
S016	21261	NN.261	Solanum melongena	Vietnam	C1	19.6451	23.0372	78861377	77704949	98.5336	0.0410054	-0.0270945	-0.0916797
S017	21262	White eggplant	Solanum melongena	Thailand	C1	19.9775	23.4271	80302986	78953147	98.3191	-0.00361389	-0.0526841	-0.0107442
S018	21263	Round green	Solanum melongena	Thailand	C1	18.2617	21.415	73108591	71835178	98.2582	0.0157963	-0.0311939	0.000864902
S019	21264	Yokmuang	Solanum melongena	Thailand	C1	18.1475	21.2811	72761194	71621176	98.4332	0.00149369	-0.0189711	0.00271269
S020	21265	Purple 33	Solanum melongena	Thailand	C1	17.7597	20.8263	71254652	69931326	98.1428	0.000896504	-0.0182052	0.00264121
S021	21266	CA BAT TRANG VA.78	Solanum melongena	Vietnam	C1	18.0424	21.1579	72327405	71268342	98.5357	0.0099077	0.0363896	-0.0524957
S022	21267	OVALA	Solanum melongena	Thailand	C1	19.4127	22.7648	77700934	76643936	98.6397	0.00306459	-0.0373252	-0.00692886
S023	21268	NN.263	Solanum melongena	Vietnam	C1	18.6765	21.9014	75066634	73926073	98.4806	0.00551017	-0.0352081	0.0169401
S024	21269	KERMIT	Solanum melongena	Thailand	C1	21.7052	25.4532	86969654	85809071	98.6655	-0.00421892	-0.0463493	-0.0113881
S025	21270	PD 613	Solanum melongena	Vietnam	C1	19.8161	23.2378	79423370	78349296	98.6477	0.166772	0.135866	0.203077
S026	21271	06061-1-3	Solanum melongena	Guangdong, China	C2	34.121	40.0128	135846264	133799226	98.4931	-0.0545196	0.0290628	-0.00805441
S027	21272	06076-12-1-3	Solanum melongena	Guangdong, China	C2	63.1885	74.0995	256799085	247662217	96.442	-0.0163717	0.0178281	-0.0883678
S028	21273	5118-3-2	Solanum melongena	Guangdong, China	C2	20.2231	23.7151	81036880	79650960	98.2898	-0.0273776	0.0664045	-0.0521143
S029	21274	5121-1/06071-2	Solanum melongena	Guangdong, China	C2	17.5539	20.5849	70193443	69145471	98.507	-0.0274755	0.0670757	-0.0548767
S030	21275	5553	Solanum melongena	Jiaoling, Guangdong, China	C3	18.8604	22.1171	75322928	74257841	98.586	-0.0247833	0.0307004	-0.0359985
S031	21276	06005	Solanum melongena	Hangzhou, Zhejiang, China	C3	17.9607	21.062	71994431	70866346	98.4331	-0.0487336	0.0189439	0.0228939
S032	21277	Lanza3-2-1	Solanum melongena	Gansu, China	C2	19.1039	22.4026	76631430	75367320	98.3504	-0.0454642	0.0432956	-0.0168121
S033	21278	07005/003M	Solanum melongena	Shanxi, China	C3	19.2807	22.61	77130014	76019916	98.5607	-0.0349033	0.0153188	0.0190678
S034	21279	07006/003F	Solanum melongena	Shanxi, China	C3	18.6864	21.913	74721340	73645118	98.5597	-0.0495283	-0.0110452	0.021788
S035	21280	09004	Solanum melongena	Guangzhou, Guangdong, China	C2	17.1436	20.1039	68414743	67380335	98.488	-0.0443208	0.028428	0.00453658
S036	21281	11004	Solanum melongena	Guangzhou, Guangdong, China	C1	18.3411	21.5081	73471635	72135542	98.1815	0.0256005	0.0134532	-0.0243987
S037	21282	07008	Solanum melongena	Shanxi, China	C3	18.1947	21.3365	72589963	71533702	98.5449	-0.0398035	-0.0338471	0.0278287
S038	21283	13-4-5-2-1	Solanum melongena	Guangzhou, Guangdong, China	C2	18.5027	21.6976	73988896	72918880	98.5538	-0.0227365	0.00147694	-0.0395274
S039	21284	10023-1-2	Solanum melongena	Guangzhou, Guangdong, China	C1	17.27	20.252	69062458	67999900	98.4615	0.187488	0.134703	0.227976
S040	21285	13007	Solanum melongena	Vietnam	C1	19.3109	22.6454	77161340	75979771	98.4687	0.0826575	-0.123746	0.0418765
S041	21286	14004	Solanum aethiopicum	France	C1	20.8396	24.4381	83504929	82285970	98.5403	0.266557	-0.106868	-0.246335
S042	21287	17002	Solanum melongena	Guangdong, China	C1	19.316	22.6514	77143224	76003847	98.523	0.0367055	-0.0238151	-0.0349881
S043	21288	17003	Solanum aethiopicum	Malaysia	C1	18.4658	21.6544	73776927	72619178	98.4307	0.239739	0.0750457	0.00341397
S044	21289	17004	Solanum melongena	Malaysia	C1	20.7803	24.3685	83036617	81775909	98.4817	0.182774	0.136414	0.222334
S045	21290	17005	Solanum melongena	Malaysia	C1	16.9689	19.8989	67890998	66674702	98.2085	0.0884377	-0.157738	-0.011472
S046	21291	P441624010	Solanum melongena	Heyuan, Guangdong, China	C3	21.8761	25.6535	87931076	86445670	98.3107	-0.0192123	0.0577088	-0.0445076
S047	21292	2017441576	Solanum melongena	Heyuan, Guangdong, China	C3	19.5292	22.9013	78118217	77046242	98.6278	0.00615229	0.0697369	-0.0403884
S048	21293	2017441637	Solanum melongena	Heyuan, Guangdong, China	C3	18.446	21.6311	73918377	72687460	98.3348	-0.0310127	0.0444068	-0.0252902
S049	21294	2017441681	Solanum melongena	Heyuan, Guangdong, China	C3	19.8388	23.2644	79652725	78401330	98.4289	-0.0183816	0.0566422	-0.0466285
S050	21295	21295	Solanum melongena	Guangdong, China	C2	18.0762	21.1975	72611002	71246643	98.121	-0.0210463	0.00947577	-0.0485125
S051	21296	2018442887	Solanum melongena	Boluo, Guangdong, China	C3	17.8023	20.8763	71338954	69998238	98.1206	-0.0156082	0.0556619	-0.050517
S052	21297	2018442552	Solanum melongena	Xinyi, Guangdong, China	C2	16.8257	19.7311	67484582	66220758	98.1272	-0.0336477	0.0230339	-0.00170985
S053	21298	Pusha purple	Solanum melongena	India	C2	19.1702	22.4804	77257296	75443986	97.6529	-0.0217515	0.0216163	-0.0792123
S054	21299	Green round	Solanum melongena	India	C1	44.9775	52.7439	185578306	176742677	95.2389	0.0766852	-0.231581	0.105925
S055	21300	Ashoka Farm Aids	Solanum melongena	India	C1	20.2121	23.7022	81073831	79598198	98.1799	0.0177779	-0.0444459	0.0438486
S056	21301	13008	Solanum melongena	Vietnam	C1	17.3353	20.3286	69297067	68269780	98.5176	-0.00297456	-0.0469913	-0.00100569
S057	21302	15012	Solanum melongena	Netherlands	C1	19.9087	23.3464	79580416	78378302	98.4894	-0.0131044	-0.0644462	0.0256875
S058	21303	0605810	Solanum melongena	Guangdong, China	C3	19.0092	22.2916	76051708	74850011	98.4199	-0.0397888	2.34281e-05	0.020931
S059	21304	5802	Solanum melongena	Guangdong, China	C3	18.7947	22.0401	75332682	73969927	98.191	-0.0398565	-0.000715338	0.0217679
S060	21305	V0133-2	Solanum melongena	Heshan, Guangdong, China	C3	19.0222	22.3068	76109364	74777187	98.2497	-0.03497	0.0256223	0.0136834
S061	21306	V1181-2	Solanum melongena	Hongkong, China	C3	19.8375	23.263	79149309	78097979	98.6717	-0.0433978	-0.00966861	0.0233519
S062	21307	05098	Solanum melongena	Dongguan, Guangdong, China	C3	17.5681	20.6016	70175659	69112503	98.485	-0.0474445	0.0144897	0.0129078
S063	21308	09011-14	Solanum melongena	Guangzhou, Guangdong, China	C2	17.8594	20.9432	71690414	70379389	98.1713	-0.0408675	0.0293121	0.00511629
S064	21309	10024-3	Solanum melongena	Guangzhou, Guangdong, China	C1	20.444	23.9741	82050712	80707495	98.3629	0.0689538	-0.228871	0.0964432
S065	21310	07009	Solanum melongena	Shanxi, China	C1	25.767	30.2163	104118452	102675910	98.6145	0.00607427	0.0349761	-0.071346
S066	21311	13005	Solanum melongena	Indonesia	C1	19.1256	22.4281	76599765	75469779	98.5248	0.0311779	-0.0122579	0.0127602
S067	21312	V0035	Solanum melongena	Yixian, Anhui, China	C3	17.1603	20.1234	68456146	67501954	98.6061	-0.047406	-0.0048327	0.0316851
S068	21313	09011-10-1	Solanum melongena	Guangzhou, Guangdong, China	C2	17.6491	20.6966	70380207	69348841	98.5346	-0.0489712	0.019656	0.00527037
S069	21314	07004	Solanum melongena	Guangzhou, Guangdong, China	C2	19.2646	22.5911	77792158	75828861	97.4762	-0.0298374	0.0338889	-0.0646287
S070	21315	11007	Solanum melongena	Malaysia	C1	17.7721	20.8408	71527232	69893292	97.7156	0.0929963	0.0537912	-0.172524
S071	21316	SW16	Solanum melongena	Malaysia	C1	17.4677	20.4839	69960117	68919175	98.5121	0.245552	0.120452	0.024243
S072	21317	14-1-1-2B1-2	Solanum melongena	Guangzhou, Guangdong, China	C2	18.3412	21.5083	73387380	72293579	98.5096	0.000933049	0.0329188	-0.0320725
S073	21318	16006-1	Solanum melongena	Shanxi, China	C2	19.6273	23.0164	78482716	77280030	98.4676	-0.0534739	0.0054176	0.00604997
S074	21319	05103-GE25	Solanum melongena	Unknown	C1	19.2188	22.5373	77145770	75988172	98.4995	0.02725	-0.221141	0.0965427
S075	21320	05110-YJ000518	Solanum melongena	South America/Unknown	C1	17.9984	21.1062	72162874	70801746	98.1138	0.0264972	-0.22374	0.0992919
S076	21321	5556-06112	Solanum melongena	Guangzhou, Guangdong, China	C2	43.3576	50.8443	178898077	170339266	95.2158	-0.02173	0.0630926	-0.0512589
S077	21322	09001-1-2	Solanum melongena	Guangzhou, Guangdong, China	C1	17.7371	20.7999	70855474	69773575	98.4731	0.207882	0.168326	0.168812
S078	21323	3-3-2-2B-1	Solanum melongena	Guangzhou, Guangdong, China	C2	18.0905	21.2143	72502472	71249242	98.2715	-0.0408263	0.00639414	-0.00918929
S079	21324	M-Baiyu3	Solanum melongena	Guangzhou, Guangdong, China	C2	35.6831	41.8446	142418912	139985006	98.291	-0.00397455	-0.00946517	-0.0467606
S080	21325	5803	Solanum melongena	Guangdong, China	C2	18.8063	22.0537	75513034	74106464	98.1373	-0.0494139	0.0319066	0.00236325
S081	21326	5804	Solanum melongena	Guangdong, China	C2	19.6321	23.022	78613861	77425518	98.4884	0.000815045	0.0755459	-0.046037
S082	21327	06019-5-1-2	Solanum melongena	Guangdong, China	C2	18.3831	21.5573	73454914	72375253	98.5302	-0.036742	0.0383258	-0.0595309
S083	21328	Fengmu eggplant	Solanum melongena	Hainan,China	C2	19.5948	22.9783	78305935	77152001	98.5264	0.00348715	0.0768242	-0.046452
S084	21329	10009-3-2-2A	Solanum melongena	Guangzhou, Guangdong, China	C2	17.0436	19.9865	68001256	67047443	98.5974	-0.000834531	0.0253725	-0.0419053
S085	21330	11008A	Solanum melongena	Malaysia	C1	18.6001	21.8118	74152570	73075764	98.5479	0.041157	0.0613051	-0.0350941
S086	21331	3-9-4-4-2B	Solanum melongena	Hainan,China	C2	19.2023	22.5181	77413787	75682368	97.7634	-0.0359382	-0.0115252	-0.00116396
S087	21332	Lanting eggplant	Solanum melongena	Guangzhou, Guangdong, China	C3	19.2408	22.5631	77246104	75787746	98.1121	0.0391036	0.0629165	0.0802088
S088	21333	Poxia eggplant	Solanum melongena	Meixian, Guangdong, China	C3	18.6021	21.8142	74590122	73412514	98.4212	-0.00791726	0.0554056	-0.0486891
S089	21334	15021	Solanum melongena	Meixian, Guangdong, China	C3	18.5575	21.7619	74586716	73283299	98.2525	-0.0188084	0.0557629	-0.0499322
S090	21335	5-1-1-2A	Solanum melongena	Guangzhou, Guangdong, China	C2	19.281	22.6103	77722921	76328180	98.2055	0.0117731	0.0248126	-0.0182492
S091	21336	YJ000515	Solanum melongena	South America/Unknown	C1	19.7308	23.1378	79397117	77937183	98.1612	-0.0172131	-0.0968539	0.0654366
S092	21337	05112-YJ000520	Solanum melongena	South America/Unknown	C3	43.0736	50.5112	176986088	169235692	95.6209	-0.0422847	-0.0111171	0.0353363
S093	21338	06049-1-3	Solanum melongena	Guangdong, China	C3	18.3802	21.554	73633598	72414999	98.3451	-0.0484008	0.00516149	0.0132022
S094	21339	09010-2-2	Solanum melongena	Guangzhou, Guangdong, China	C1	18.2018	21.3448	72852705	71607011	98.2901	0.18522	0.134667	0.226944
S095	21340	09011-3	Solanum melongena	Guangzhou, Guangdong, China	C2	17.3919	20.3951	69778925	68583199	98.2864	-0.0348461	0.0206072	0.0122558
S096	21341	10009-5-3-2-2	Solanum melongena	Guangzhou, Guangdong, China	C2	18.3683	21.54	73912498	72282878	97.7952	-0.0107064	0.0325622	-0.0150926
S098	21343	15009	Solanum violaceum	Yangjiang, Guangdong, China	C1	44.4489	52.1241	79563559	77970656	97.9979	0.248409	-0.10219	-0.202882
S099	21344	V0200	Solanum melongena	Dongguang, Hebei, China	C3	18.5461	21.7485	182140894	174567663	95.8421	-0.0402179	-0.0392863	0.0318703
S100	21345	Bobai	Solanum melongena	Bobai, Guangxi, China	C3	21.2682	24.9406	74564195	73265331	98.2581	-0.0280587	0.00282985	0.0223716
S101	21346	06054-1	Solanum melongena	Guangzhou, Guangdong, China	C2	19.7017	23.1036	85576921	84031521	98.1941	-0.0476454	0.0235636	0.00287414
S102	21347	96A-3/06069-4	Solanum melongena	Guangdong, China	C2	19.1933	22.5074	79257572	78012433	98.429	-0.0281187	0.0669991	-0.0530371
S103	21348	08004-2-1-1	Solanum melongena	Guangzhou, Guangdong, China	C2	18.5752	21.7827	76969192	75593894	98.2132	-0.0541571	0.0301428	-0.0087728
S104	21349	10013-3-5-3-2	Solanum melongena	Guangzhou, Guangdong, China	C2	18.6263	21.8426	74705115	73269856	98.0788	-0.0308409	-0.00652353	-0.0329528
S105	21350	2013BB	Solanum melongena	Shanxi, China	C2	20.7966	24.3877	74494834	73323974	98.4283	-0.0182076	0.0194669	-0.0871949
S106	21354	07019-1-2-1	Solanum melongena	Guangzhou, Guangdong, China	C3	18.7727	22.0142	83377695	82333158	98.7472	-0.0304465	-0.0206604	-0.0090667
S107	21355	07010/001M	Solanum melongena	Shanxi, China	C2	19.8215	23.2442	75097297	73984698	98.5185	0.0641368	0.0900226	0.0547971
S108	21356	07011/001F	Solanum melongena	Shanxi, China	C2	19.0494	22.3387	79188189	77975971	98.4692	-0.0494674	0.0318257	0.00237825
S109	21357	07012	Solanum melongena	Shanxi, China	C2	17.7679	20.8359	75987187	74864759	98.5229	-0.0539805	0.0322468	-0.000710268
S110	21358	158	Solanum melongena	Guangdong, China	C1	19.6343	23.0246	71195110	70028630	98.3616	0.0904125	0.0398453	-0.17339
S111	21359	162	Solanum melongena	Unknown	C3	20.7178	24.2952	78511492	77436385	98.6306	0.0137169	0.0621611	-0.0580668
S112	21360	5119-2	Solanum melongena	Thailand	C2	21.1618	24.8159	83001203	81812185	98.5675	-0.0272155	0.0677593	-0.0538886
S113	21361	5120-2D/05184-2	Solanum melongena	Guangdong, China	C2	21.2772	24.9512	84975584	83477867	98.2375	-0.0380254	0.0267976	0.00234933
S114	21362	5122	Solanum melongena	Zhejiang, China	C3	20.8337	24.4311	85556279	84102117	98.3003	-0.0450966	0.0208585	0.0229208
S115	21363	5295	Solanum melongena	Guangdong, China	C2	21.4075	25.104	83067898	81875480	98.5645	-0.052208	0.0322203	0.00258678
S116	21364	5552	Solanum melongena	Gansu, China	C2	19.9323	23.374	85402204	84107009	98.4834	-0.0334963	0.0228764	-0.00159326
S117	21365	5561	Solanum melongena	Gansu, China	C2	22.7861	26.7206	79645113	78362981	98.3902	-0.0495613	0.0268152	0.00908771
S118	21366	5563	Solanum melongena	Taiwan, China	C2	19.7769	23.1919	90882399	89595482	98.584	-0.041045	0.0232385	0.00183292
S119	21367	5578	Solanum melongena	Unknown	C3	19.3301	22.6679	79252987	77930057	98.3308	-0.0413323	-0.00669609	0.0197404
S120	21368	5605	Solanum melongena	Thailand	C2	21.5636	25.287	77432384	76200569	98.4092	-0.0520449	0.0316829	0.00366851
S121	21369	5760	Solanum melongena	Guangzhou, Guangdong, China	C2	19.6426	23.0343	86506733	85210072	98.5011	-0.0501597	0.0326654	0.00216628
S122	21370	5761-3	Solanum melongena	Unknown	C3	19.6695	23.0659	78717272	77417327	98.3486	-0.0432029	0.00532191	0.0135749
S123	21371	5808-2-1	Solanum melongena	Unknown	C3	19.2545	22.5792	78659603	77433305	98.441	-0.0485841	0.00956509	0.0188665
S124	21372	Yin3-2	Solanum melongena	Unknown	C2	21.5946	25.3234	76902285	75718544	98.4607	-0.0407496	0.0262276	0.00949131
S125	21373	Yahuahong	Solanum melongena	Hunan, China	C3	20.9067	24.5168	86301873	84857928	98.3269	-0.0490945	0.0138709	0.0184891
S126	21374	Nanbei green	Solanum melongena	Henan,China	C3	43.9548	51.5446	83480433	82232643	98.5053	-0.0434031	-0.00848338	0.0185936
S127	21375	Qiong1	Solanum melongena	Hainan,China	C3	19.1464	22.4525	180154215	172581127	95.7963	-0.0518826	0.000151871	0.0152617
S128	21376	Long Tom	Solanum melongena	Singapore	C1	19.7425	23.1515	76656622	75414409	98.3795	-0.0194078	-0.0834546	0.0556778
S129	21377	V06B0014	Solanum melongena	Jiangsu, China	C3	20.9701	24.5911	79298162	77849005	98.1725	-0.0428893	-0.00719587	0.0289571
S130	21378	Yuanxuan4	Solanum melongena	Anhui, China	C3	24.4143	28.63	84846016	83404254	98.3007	-0.0476424	-0.0142895	0.0285656
S131	21379	Yixianhong	Solanum melongena	Yixian, Anhui, China	C3	20.3236	23.833	98250055	96581498	98.3017	-0.0442256	0.00580467	0.0253363
S132	21380	V06B0037	Solanum melongena	Jinan, Shandong, China	C3	18.1051	21.2313	81623152	80167764	98.2169	-0.0432963	-0.0135184	0.0332877
S133	21381	V06B0037	Solanum melongena	Jinan, Shandong, China	C3	20.7413	24.3228	72607314	71263404	98.1491	-0.0431136	-0.0148053	0.0298544
S134	21382	V06B0099	Solanum melongena	Putian, Fujian, China	C3	19.8477	23.2749	83343188	81783681	98.1288	-0.0459894	0.0186628	0.0186266
S135	21383	V06B0102	Solanum melongena	Quanzhou, Fujian, China	C3	20.0261	23.4841	79647907	78109589	98.0686	-0.0479211	0.0208806	0.0179733
S136	21384	V06B0119	Solanum melongena	Dongguan, Guangdong, China	C2	19.9019	23.3385	80533973	79190917	98.3323	-0.0499955	0.0312809	0.00109518
S137	21385	Dunhe	Solanum melongena	Guangzhou, Guangdong, China	C2	16.8749	19.7888	79960095	78538776	98.2225	-0.0510121	0.0300689	0.00141141
S138	21386	Yuanjing	Solanum melongena	Guangzhou, Guangdong, China	C2	22.687	26.6044	67758351	66569356	98.2452	-0.0527537	0.0322779	0.000587361
S139	21387	Nanhaihong	Solanum melongena	Nanhai, Guangdong, China	C3	21.8841	25.6629	90916910	89531343	98.476	-0.0283765	0.0284272	-0.0102466
S140	21388	V06B0139	Solanum melongena	Zhanjiang, Guangdong, China	C2	19.4229	22.7767	87838283	86259942	98.2031	-0.0500561	0.0205718	9.0496e-05
S141	21389	Liantang	Solanum melongena	Liuzhou, Guangxi, China	C3	20.0831	23.551	77911227	76421606	98.0881	-0.0118005	0.0521494	-0.0424895
S142	21390	Wangbu	Solanum melongena	Wuzhou, Guangxi, China	C3	20.0546	23.5175	80299609	78988328	98.367	0.0525807	0.0852395	0.0614891
S143	21391	Dushan	Solanum melongena	Dushan, Guizhou, China	C3	21.0742	24.7131	80403956	78942654	98.1825	-0.0426481	-0.00369908	0.0261085
S144	21392	Tongren	Solanum melongena	Tongren, Guizhou, China	C3	21.3541	25.0414	84630667	82990220	98.0616	-0.0483572	0.017047	0.0146256
S145	21393	Dongguang white	Solanum melongena	Dongguang, Hebei, China	C3	19.7741	23.1886	85784527	84268443	98.2327	-0.0411516	-0.0240331	0.0267575
S146	21394	Qiqie2	Solanum melongena	Qiqihaer, Heilongjiang, China	C3	18.3839	21.5583	79415774	77930599	98.1299	-0.042753	-0.00569685	0.0198279
S147	21395	Longmenchi1	Solanum melongena	Chenzhou, Hunan, China	C3	20.6452	24.21	73699216	72430206	98.2781	-0.0451362	0.00779982	0.0152268
S148	21396	Longmenchi2	Solanum melongena	Chenzhou, Hunan, China	C3	20.5557	24.1052	82719356	81388855	98.3915	-0.0368354	0.0167466	0.0149951
S149	21397	Yaotou	Solanum melongena	Lanshan, Hunan, China	C3	18.5415	21.7431	82370741	80855573	98.1606	-0.0369869	0.00966001	0.00807584
S150	21398	Zhusi	Solanum melongena	Wugang, Hunan, China	C3	19.3625	22.706	74268451	72872912	98.121	-0.0365633	0.0130775	0.0142488
S151	21399	Malu	Solanum melongena	Suzhou, Jiangsu, China	C3	18.8119	22.0602	77621059	76158401	98.1156	-0.0446796	-0.0110443	0.0330121
S152	21400	V06B0488	Solanum melongena	Benxi, Liaoning, China	C3	20.4692	24.0037	75585559	74139581	98.087	-0.0391227	-0.009245	0.0146972
S153	21401	V06B0546	Solanum melongena	Japan	C3	20.6473	24.2125	82193791	80633468	98.1017	-0.0331602	-0.0377893	0.0373171
S154	21402	Baihua	Solanum melongena	Leibo, Sichuan, China	C3	23.2707	27.289	82912997	81333683	98.0952	-0.0456114	-0.0143992	0.0271811
S155	21403	Changmo	Solanum melongena	Wenjiang, Sichuan, China	C3	18.4837	21.6753	93262496	91750126	98.3784	-0.0478438	-0.0162515	0.0276456
S156	21404	Wubangmo	Solanum melongena	Meishan, Sichuan, China	C3	19.9743	23.4234	74110710	72819244	98.2574	-0.0463267	-0.0171353	0.0304539
S157	21405	Minqie1	Solanum melongena	Fuzhou, Fujian, China	C3	19.787	23.2037	79946895	78514587	98.2084	-0.039945	0.0203288	0.0222583
S158	21406	Kangxuanhuapei	Solanum melongena	Haerbin, Heilongjiang, China	C3	18.2692	21.4239	79303447	77983925	98.3361	-0.0459085	0.00202307	0.026139
S159	21407	V06B1167	Solanum melongena	America	C3	19.7001	23.1017	73226580	71883581	98.166	-0.0438317	-0.00304472	0.0189509
S160	21408	Heichibao	Solanum melongena	Taiwan, China	C3	22.8195	26.7599	78939789	77707509	98.439	-0.0429604	-0.00986079	0.0236803
S161	21409	V06B1177	Solanum melongena	Changchun, Jilin, China	C3	20.5474	24.0954	91541043	90159838	98.4912	-0.0432893	-0.0101867	0.0220457
S162	21410	Xinchangqi	Solanum melongena	Nanjing, Jiangsu, China	C3	18.9006	22.1642	82489033	81053872	98.2602	-0.0382606	-0.0150853	0.0355958
S163	21411	10-702	Solanum melongena	Unknown	C1	18.1371	21.2689	75740860	74482822	98.339	0.00232078	-0.0903327	0.0467797
S164	21412	YJ20030237	Solanum melongena	South America/Unknown	C1	18.4952	21.6889	72794411	71525708	98.2571	-0.0196055	-0.0847669	0.0573183
S165	21413	YJ000514	Solanum melongena	South America/Unknown	C1	18.304	21.4646	74506467	72750373	97.643	0.000856406	-0.14734	0.0776035
S166	21414	YJ000515	Solanum melongena	South America/Unknown	C1	16.8192	19.7234	73287018	71960517	98.19	-0.0044136	-0.134112	0.0759404
S167	21415	YJ000516	Solanum melongena	South America/Unknown	C1	20.2466	23.7427	67368712	66178263	98.2329	-0.0118048	-0.0766266	0.061179
S168	21416	YJ000518	Solanum melongena	South America/Unknown	C1	9.06415	10.6293	81146547	79850817	98.4032	-0.0204506	-0.0823693	0.0565299
S169	21417	YJ000519	Solanum melongena	South America/Unknown	C1	18.39	21.5655	36635176	35674305	97.3772	-0.0208191	-0.0834412	0.0574773
S170	21418	V0035	Solanum melongena	Yixian, Anhui, China	C3	20.8049	24.3974	73751483	72449484	98.2346	-0.0433971	0.00386041	0.0219069
S171	21419	YJ000521	Solanum melongena	South America/Unknown	C1	16.6301	19.5017	83693430	82197422	98.2125	0.0842781	-0.221577	0.112513
S172	21420	YJ000522	Solanum aethiopicum	South America/Unknown	C1	19.6842	23.0831	66902379	65666330	98.1525	0.257851	-0.103412	-0.242026
S173	21421	YJ000523	Solanum aethiopicum	South America/Unknown	C1	17.8557	20.9389	78974020	77696775	98.3827	0.261775	-0.105189	-0.243276
S174	21422	YJ000524	Solanum melongena	South America/Unknown	C3	20.5381	24.0844	71589356	70258305	98.1407	-0.0235357	0.041155	-0.00980365
S175	21220	4138F9	Solanum melongena	Guangzhou, Guangdong, China	C2	18.316	21.4786	82153502	80712152	98.2455	-0.0190317	0.0190037	-0.0875835
S176	21228	F-Nongfu2	Solanum melongena	Guangzhou, Guangdong, China	C2	37.1113	43.5195	73107593	71994898	98.478	-0.0231732	0.0225709	-0.0896909
S177	21231	M-Nogfu2	Solanum melongena	Guangzhou, Guangdong, China	C2	44.2637	51.9069	147753189	145652992	98.5786	-0.0382476	0.00127151	-0.0311577
S178	21240	3-5A4-1	Solanum melongena	Guangzhou, Guangdong, China	C2	20.2889	23.7923	176882928	173809370	98.2624	-0.029413	0.00674934	-0.0543782
S179	21241	5910	Solanum melongena	Foshan, Guangdong, China	C3	18.7863	22.0302	81264675	79907101	98.3294	-0.043752	0.00999501	0.0168277
S180	19141	19141	Solanum melongena	Guangzhou, Guangdong, China	C3	19.3435	22.6836	75162107	74124105	98.619	0.0130134	0.0478941	-0.0715145
S181	19147	19147	Solanum melongena	Heyuan, Guangdong, China	C3	68.7979	80.6774	86554073	83766155	96.779	0.020498	0.0513471	-0.0800124
S182	19306	19306	Solanum melongena	Guangzhou, Guangdong, China	C2	20.8248	24.4207	286653627	275995233	96.2818	-0.0113825	0.00415871	-0.0262714
S183	19146	19146	Solanum melongena	Guangzhou, Guangdong, China	C2	19.2995	22.632	82951626	81735120	98.5335	-0.0486822	0.0240124	0.00651862
S184	19142	19142	Solanum melongena	Thailand	C1	57.8244	67.8092	76969186	75818402	98.5049	-0.00158905	-0.0514977	-0.0143302
S185	19144	19144	Solanum melongena	Netherlands	C1	56.8489	66.6652	238442573	226987881	95.196	0.21832	0.167077	0.173572
S186	19145	19145	Solanum melongena	Guangzhou, Guangdong, China	C1	19.4931	22.8591	233715593	223141799	95.4758	0.0864914	0.0392424	-0.169293
S187	19305	19305	Solanum melongena	Foshan, Guangdong, China	C1	18.9955	22.2755	77959636	76741458	98.4374	0.000405507	0.0431984	-0.017012
S188	06039	06039	Solanum melongena	France	C3	20.3979	23.9201	76026811	74774256	98.3525	-0.0446582	-0.0115891	0.0325937
S189	21106	18010	Solanum melongena	Jieyang, Guangdong, China	C3	20.8744	24.4789	81797056	80317335	98.191	-0.0424518	-0.000160112	0.0222522
S190	190	Zhusi2	Solanum melongena	Unknown	C3	18.1387	21.2708	83710266	82137354	98.121	-0.048407	-0.0078341	0.0230764
S191	B07	Long green eggplant	Solanum melongena	Thailand	C1	18.67	21.8938	72862286	71517973	98.155	0.0304272	0.0271479	-0.0578763
S192	13004	13004	Solanum melongena	Thailand	C1	18.1768	21.3155	74965725	73653486	98.2495	0.195195	0.144956	0.196659
S193	10013-6	10013-6	Solanum melongena	Guangzhou, Guangdong, China	C1	19.3497	22.6909	72666196	71500351	98.3956	0.0521714	-0.196916	0.0991706
S194	19143	19143	Solanum melongena	Guangzhou, Guangdong, China	C2	32.8514	38.5239	77518657	76143645	98.2262	-0.0398078	0.0278565	0.00423353
S195	NF	NF	Solanum melongena	Guangdong, China	C2	38.213	44.8114	132876406	128957833	97.051	-0.0360165	0.0236364	-0.0483292
S196	E4017	Nongfu2	Solanum melongena	Guangdong, China	C2	41.4981	48.6637	152892043	150188624	98.2318	-0.0290175	0.0168841	-0.0668849
S197	E3822	Baiyu3	Solanum melongena	Guangdong, China	C2	37.6501	44.1512	165561737	163018319	98.4638	0.0268038	0.0330117	-0.0867222
S200	A02	Kuaiyuan	Solanum melongena	Tianjin, China	C2	21.5087	25.2227	149974398	147711376	98.4911	-0.0274579	0.0670806	-0.0549727
S203	E3821	Baiyu2	Solanum melongena	Guangdong, China	C2	28.932	33.9278	139845389	132317773	94.6172	0.000501965	0.0327621	-0.0318901
S204	HQ-1315	HQ-1315	Solanum melongena	Zhejiang, China	C3	15.055	16.5605	86487112	84906466	98.1724	-0.0463061	0.0196584	0.0185225
S205	GUIQIE-1	GUIQIE-1	Solanum melongena	Guangxi, China	C1	19.2368	21.1605	115251757	113278430	98.2878	-8.549e-05	-0.0321036	-0.0355693
S206	67/3	67/3	Solanum melongena	Italy	C3	21.3963	23.536	57882984	55330887	95.5909	-0.0303053	-0.0455465	0.0313045

## Sheet: TableS2
Supplementary Table2. Genome assembly and annotation statistics of the 9 assembled genomes.
Sample ID	Species	HiFi (G)	Hi-C (G)	Genome size (bp)	Contig N50 (bp)	Contig N90 (bp)	Contig number	Mapping rate (%)	Coverage (%)	Complete BUSCO (%)	Maximum length (bp)	Number of genes	Complete BUSCO (%)	Annotated gene number	Annotated gene rate (%)	Repeat Size(bp)	Repeat percetage (%)	tRNA number	rRNA number	snRNA number	miRNA number	LINE length (bp)	LINE percentage (%)	SINE length (bp)	SINE percentage (%)	LTR length （bp）	LTR percentage (%)	DNA transposon Length (bp)	DNA transposon percentage (%)	Total TE length (bp)	Total TE percentage (%)	Swissprot gene number	Swissprot gene percentage (%)	Nr gene number	Nr gene percentage (%)	KEGG gene number	KEGG gene percentage (%)	InterPro gene number	InterPro gene percentage (%)	GO gene number	GO gene percentage (%)	Pfam gene number	Pfam gene percentage (%)	Unannotated gene number	Unannotated gene percentage (%)	CNGB genome assembly accession number
S027	S. melongena	40	127.583	1199329039	38731236	9511817	1143	99.8	99.33	99.2	104648345	34425	95.8	33793	98.16	842562158	70.25	4480	11076	579	297	17457298	1.46	176069	0.01	787743367	65.68	19496510	1.63	830580027	69.25	24144	70.14	33444	97.15	24905	72.35	31435	91.31	18252	53.02	23321	67.74	632	1.84	CNA0142774
S054	S. melongena	40	119.168	1179736022	55039772	15050587	855	99.81	99.9	99.5	105114930	35605	95.4	35038	98.41	825120366	69.94	6533	7568	563	301	17054310	1.45	211177	0.02	772929556	65.52	22948518	1.95	813581706	68.96	25587	71.86	34780	97.68	26532	74.52	32670	91.76	19283	54.16	24641	69.21	567	1.59	CNA0142775
S076	S. melongena	36.9	137.898	1172673519	48628386	9579642	694	99.77	99.9	99.4	100356198	34784	95.5	34184	98.3	825847542	70.42	5417	11328	565	293	16097421	1.37	126497	0.01	769229062	65.6	22416221	1.91	813838123	69.4	24252	69.7	33844	97.3	25549	73.5	31767	91.3	18203	52.3	23462	67.5	600	1.7	CNA0142776
S092	S. melongena	31.3	128.747	1149536025	48503972	10753265	289	99.81	99.93	99.3	78395484	34515	96	33891	98.2	808313838	69.96	3662	6356	565	294	17473813	1.51	212456	0.02	757651054	65.58	16808000	1.45	796971446	68.98	24349	70.5	33583	97.3	25196	73	31461	91.2	18271	52.9	23457	68	624	1.8	CNA0142777
S098	S. violaceum	34.1	124.123	1194869048	59666499	20342278	481	99.77	99.91	99.3	104435709	34813	95.3	34210	98.3	821913884	68.79	4297	11751	598	308	16591821	1.39	169621	0.01	768827500	64.34	18713128	1.57	810074912	67.8	24000	68.9	33871	97.3	25259	72.6	31749	91.2	18073	51.9	23438	67.3	603	1.7	CNA0142778
S126	S. melongena	33.9	151.882	1174714626	47312801	11575407	915	99.83	99.93	99.5	101662642	35096	96.1	34468	98.2	826739179	70.38	6350	9797	555	299	17463919	1.49	198573	0.02	770840394	65.62	26458382	2.25	815495690	69.42	24334	69.3	34144	97.3	25536	72.8	31930	91	18217	51.9	23397	66.7	628	1.8	CNA0142779
S181	S. melongena	33.7	132.773	1186200118	42600900	10668530	1148	99.69	99.89	99.4	101997964	34455	95.1	33947	98.5	828947242	69.88	9147	6704	571	287	15927119	1.34	117923	0.01	771468289	65.04	31002046	2.61	817265405	68.9	25463	73.9	33704	97.8	25772	74.8	31701	92	19188	55.7	24905	72.3	508	1.5	CNA0142780
S184	S. melongena	36.6	155.942	1153082367	54803906	20969609	283	99.64	99.9	99.5	104385067	33620	96	33066	98.4	805686654	69.87	2862	6254	569	295	17780586	1.54	163343	0.01	759467205	65.86	14572209	1.26	794236141	68.88	23763	70.7	32747	97.4	24471	72.8	30914	92	17861	53.1	22931	68.2	554	1.6	CNA0142781
S185	S. melongena	34.3	115.469	1168248984	41478141	11698171	619	99.8	99.91	99.5	101068560	35328	96.4	34758	98.4	817122772	69.94	5404	7693	571	295	16484786	1.41	152566	0.01	758809927	64.95	23106792	1.98	805605501	68.96	24834	70.3	34450	97.5	25935	73.4	32228	91.2	18511	52.4	23853	67.5	570	1.6	CNA0142782

## Sheet: TableS3
Supplementary Table 3. Gene ontology (GO) enrichment in defense-related terms of 14 eggplant genomes.
GO_ID	corrected p-value(BH method)	Description	GeneRatio	BgRatio
GO:0050688	0	regulation of defense response to virus	126/53472	316/276046
GO:0051607	0	defense response to virus	627/53472	1728/276046
GO:0140546	0	defense response to symbiont	627/53472	1728/276046
GO:0052482	1.8375e-10	defense response by cell wall thickening	124/53472	360/276046
GO:0052544	1.8375e-10	defense response by callose deposition in cell wall	124/53472	360/276046
GO:0050687	0.0294138	negative regulation of defense response to virus	20/53472	60/276046
GO:0050829	2.46979e-07	defense response to Gram-negative bacterium	129/53472	422/276046
GO:0052542	6.5802e-05	defense response by callose deposition	124/53472	446/276046
GO:0098542	2.91309e-14	defense response to other organism	5081/53472	19246/276046
GO:0006952	4.25663e-15	defense response	7174/53472	28491/276046
GO:1900150	0.107554	regulation of defense response to fungus	149/53472	667/276046
GO:0050832	0.0150709	defense response to fungus	988/53472	4720/276046

## Sheet: TableS4
Supplementary Table 4: The number of structural variants identified between S076 and each of the other 12 eggplant accessions using the pairwise whole-genome alignment method.
Accessions	Deletions (DEL)	Insertions (INS)	Inversions (INV)	Translocations (TRA)	Total
S092	3428	3203	18	6	6655
S126	3491	3354	19	5	6869
HQ01	5335	6638	48	41	12062
S181	2698	2527	16	4	5245
S185	3890	3785	31	9	7715
S027	3278	3274	9	6	6567
GQ01	4381	4120	33	18	8552
S184	4492	4477	22	6	8997
PI200	4684	4773	21	8	9486
S054	6449	6245	30	22	12746
PI196	11098	12662	60	70	23890
PI180	9389	10245	55	36	19725
Cumulative Total	62613	65303	362	231	128509
Unique number	31426	34026	370	111	65933
Outgroup/S098	43028	45540	466	149	89183
Note: DEL and INS (> 50bp); INV (>10 Kb); TRA (> 100 Kb)

## Sheet: TableS5
Supplementary Table 5: The coordinates (according to S076) of large inversions (approximately 5 Mb or larger) that are segregating within the eggplant population identified in our sample.
Chromosome	Begin	End	Query	Length
S076.Chr01	65650211	71725946	GQ01	6075735
S076.Chr02	1143719	5900934	S185	4757215
S076.Chr04	14097692	21998679	PI196	7900987
S076.Chr04	50353909	62380969	S181	12027060
S076.Chr04	33141947	46562800	S181	13420853
S076.Chr04	58177601	74777806	S126	16600205
S076.Chr06	29215427	36015291	PI180	6799864
S076.Chr07	20817339	39536391	HQ01	18719052
S076.Chr07	59501174	65098899	PI180	5597725
S076.Chr09	14284276	79453007	S184	65168731
S076.Chr10	54355773	59402953	S185	5047180
S076.Chr10	67810770	80505258	S185	12694488

## Sheet: TableS6
Supplementary Table 6: The number of the derived variants inferred using S098 as the outgroup.
Variant Types	Total number	Number of variants with derived status inferred	Proportion
intergenicSNP	8523429	2573024	0.301877
missenseSNP	61497	45071	0.732898
synonymous	33329	26781	0.803534
LTR	24611	7146	0.290358
DNA	6188	2446	0.395281
INS	34026	13624	0.4004
DEL	31426	10476	0.333355
CNS	6962	2446	0.351336
TATA	13641	5453	0.399751
Genes	1005	2303	2.29154
INVs	461	206	0.446855
Other	14050	5565	0.396085
Small Deletions	90540	20617	0.227712
Small Insertions	52296	17706	0.338573
All types	8893461	2732864	0.307289

## Sheet: TableS7
Supplementary Table 7: SV-affected genes that are significantly differentially expressed in fruit.
Chr ID	Gene-start	Gene-end	Gene Function	SV-start	SV-end	SV-count		Average of the gene expression		p
						0	11	0	11
Chr01	17281269	17301583	COP9 signalosome complex subunit	17289382	17289383	5	12	58.8776	43.7171	0.0234331
Chr01	17995818	17996665	Probable serine/threonine-protein kinase	17998173	17998174	9	9	3.05617	35.1409	0.0272754
Chr01	19932784	19937074	S-adenosyl-L-methionine-dependent	19938940	19938941	8	10	2.81699	4.41023	0.0367951
			uroporphyrinogen III methyltransferase
Chr01	106704431	106726042	BTB/POZ and MATH domain-containing protein	106727312	106727313	10	9	47.9863	37.319	0.012763
Chr01	110664464	110681208	Transcription factor IIIB 90 kDa subunit	110671162	110671163	13	5	3.6733	1.17839	0.0179937
Chr01	110808156	110813238	Sorbitol dehydrogenase	110807877	110807878	7	9	99.7196	65.1336	0.0342578
Chr01	9358177	9363604	NA	9359672	9359673	15	5	35.0307	68.9824	0.02324
Chr02	68768415	68769873	NA	68768011	68768012	13	5	50.1616	22.7726	0.0179937
Chr02	68775246	68779819	Pentatricopeptide repeat-containing protein	68778871	68778872	12	7	17.0401	6.47354	0.0311506
Chr02	73857137	73868092	NA	73861284	73861285	13	7	16.0991	86.0841	0.0140449
Chr02	79020289	79023959	WAT1-related protein	79024540	79024541	12	7	29.3622	11.8993	0.00354798
Chr02	79711386	79715628	Uncharacterized membrane protein	79710792	79710793	10	8	91.1271	62.6159	0.0294894
Chr03	92608360	92609763	Pentatricopeptide repeat-containing protein	92607477	92607478	14	6	50.9885	27.5948	0.0187411
Chr03	93204463	93258966	Serine/threonine-protein kinase	93208579	93208580	13	7	3.40104	1.52289	0.0475832
Chr03	93204463	93258966	Serine/threonine-protein kinase	93249248	93249249	13	7	3.40104	1.52289	0.0475832
Chr03	99887042	99887801	NA	99888968	99888969	7	11	3.93857	1.04173	0.0037539
Chr05	5655140	5667586	Probable histone-arginine methyltransferase	5653820	5653821	7	13	42.1083	22.2253	0.00152588
Chr05	5750222	5758766	Epoxide hydrolase	5749060	5749061	6	9	136.305	67.6151	0.00800994
Chr05	5777201	5793388	Probable acyl-CoA dehydrogenase	5782545	5782546	6	14	16.1866	5.59126	0.000836627
Chr05	1076376	1079502	1-aminocyclopropane-1-carboxylate synthase	1076894	1076895	13	7	1.30667	1.67534	0.0323905
Chr05	1091801	1093211	Delta(8)-fatty-acid desaturase	1094027	1094028	7	12	3.60609	407.615	0.0224352
Chr06	60563075	60567678	Phosphoglucan phosphatase	60566168	60566169	12	7	31.0675	19.1203	0.0160099
Chr06	70324869	70373804	NA	70349140	70349141	10	8	5.96469	3.30609	0.00876353
Chr06	74113759	74117625	Probable 6-phosphogluconolactonase	74114615	74114616	12	6	2.72657	92.4985	0.000884567
Chr06	80886246	80894969	Mannose-6-phosphate isomerase	80889505	80889506	13	5	19.0032	85.8324	0.0137273
Chr06	82714184	82722957	Putative casein kinase II subunit	82724342	82724343	13	7	143.072	112.313	0.0393684
Chr06	3870778	3880714	LRR repeats and ubiquitin-like domain-containing protein	3881533	3881534	12	6	38.1712	19.769	0.0169268
Chr06	92554595	92560990	ABC transporter F family member	92553793	92553794	11	9	18.3815	30.4572	0.00979151
Chr07	2345760	2351551	Probable WRKY transcription factor	2343871	2343872	5	13	5.68042	12.2425	0.0384496
Chr07	110022670	110025758	Peroxidase	110026389	110026390	11	6	3.08476	10.1134	0.00773669
Chr07	112531441	112537081	60S ribosomal protein L18a-like protein	112538280	112538281	5	14	61.4904	37.4709	0.0295794
Chr07	113041949	113049254	Probable beta-1,3-galactosyltransferase	113044283	113044284	8	10	13.6039	8.70869	0.0455892
Chr07	113041949	113049254	Probable beta-1,3-galactosyltransferase	113046183	113046184	8	10	13.6039	8.70869	0.0455892
Chr07	114757228	114761090	Septum-promoting GTP-binding protein	114761925	114761926	14	5	16.0271	9.63614	0.0182335
Chr07	114770327	114776048	NA	114770334	114770335	13	5	66.2508	35.0224	0.0137273
Chr07	7395657	7407409	NA	7405243	7405244	7	13	23.78	32.5067	0.0215593
Chr07	27196123	27206731	Lariat debranching enzyme	27198842	27198843	9	6	10.9749	27.3008	0.00178984
Chr07	27196123	27206731	Lariat debranching enzyme	27208270	27208271	9	9	10.9749	25.2707	0.000412295
Chr07	1404097	1420915	Protein TSS	1413287	1413288	13	6	6.87812	3.54623	0.0253192
Chr08	87025326	87028211	Protein TORNADO	87029181	87029182	11	9	3.72331	1.36014	0.0224512
Chr08	93579214	93580290	Uncharacterized protein At1g01500	93581780	93581781	5	15	10.7741	37.1813	0.0446853
Chr08	6880136	6884874	Ubiquitin carboxyl-terminal hydrolase	6883078	6883079	14	5	15.588	4.14708	0.00474652
Chr09	89435726	89436016	NA	89434642	89434643	14	5	6.09569	1.00632	0.0461505
Chr09	823633	909471	Probable DNA primase large subunit	852698	852699	13	5	19.1748	9.2941	0.0301129
Chr09	823633	909471	Probable DNA primase large subunit	903164	903165	12	6	20.0818	9.1268	0.0169268
Chr10	82039814	82042418	Protein LURP-one-related	82044068	82044069	15	5	371.939	81.187	0.0290963
Chr10	83219024	83221694	60S ribosomal protein	83217706	83217707	12	5	95.8808	26.4754	0.0177061
Chr10	85128230	85130031	NA	85126824	85126825	8	8	152.554	22.1446	0.018129
Chr10	85558287	85565304	Protein DETOXIFICATION	85564006	85564007	9	5	24.633	64.9758	0.0234106
Chr11	1734633	1745443	Senescence-associated protein	1736889	1736890	9	9	36.6993	16.277	0.00807149
Chr11	102151702	102152870	NA	102154415	102154416	10	7	2.39481	31.0473	0.00291564
Chr11	5612743	5613928	Transcription repressor	5612071	5612072	14	5	4.78347	1.88624	0.0465344
Chr11	778946	782496	Serine/threonine/tyrosine-protein kinase	784149	784150	6	13	5.75792	3.3361	0.0392948
Chr11	784485	786422	Alanine aminotransferase	784149	784150	6	13	30.3975	7.51351	0.00316628
Chr12	73834867	73840305	Dr1-associated corepressor	73833937	73833938	9	5	28.3006	17.8734	0.00511026
Chr12	75120364	75124693	Nuclear speckle splicing regulatory protein	75118652	75118653	8	9	34.8844	49.9383	0.0107734
Chr12	75120364	75124693	Nuclear speckle splicing regulatory protein	75120519	75120520	6	9	36.6648	49.9383	0.0292392
Chr12	3012251	3020489	Synaptotagmin-5	3018946	3018947	11	7	21.8468	11.5943	0.0144732
Chr12	3020439	3026652	Bifunctional purple acid phosphatase	3018946	3018947	11	7	3.99022	1.14364	0.0111751

## Sheet: TableS8
Supplementary Table 8 Genotypes of Inversion and InDel associated with fruit color.
Sample ID	Location	Fruit color	Inversion	InDel
S001	Malaysia	Purple	0	0_0
S002	Malaysia	Purple	0	0_0
S003	Vietnam	Purple	1	0_0
S004	Malaysia	Green	0	0_0
S005	Guangdong_China	Purple	1	0_0
S006	Malaysia	Purple-Green	0	0_0
S007	Guangdong_China	Green	0	0_0
S008	Guangdong_China	Green-White	0	0_0
S009	Thailand	White	0	0_0
S010	Thailand	Purple	0	0_0
S011	Thailand	White	0	1_1
S012	Unknown	Purple	1	0_0
S013	Guangdong_China	Purple	0	0_0
S014	Thailand	Purple	0	0_0
S015	Vietnam	White	0	0_0
S016	Vietnam	White	0	9_9
S017	Thailand	White	0	0_0
S018	Thailand	White-Green	0	0_0
S019	Thailand	Purple-Green	0	0_0
S020	Thailand	Green	0	0_0
S021	Vietnam	Purple	0	0_0
S022	Thailand	White-Green	0	9_9
S023	Vietnam	White-Green	0	1_1
S024	Thailand	White-Green	0	0_0
S025	Vietnam	Purple	0	0_0
S026	Guangdong_China	Purple	1	0_0
S027	Guangdong_China	Purple	1	0_0
S028	Guangdong_China	Purple	1	0_0
S029	Guangdong_China	Purple	1	0_0
S030	Guangdong_China	Purple	1	0_0
S031	Zhejiang_China	Purple	1	0_0
S032	Gansu_China	Purple	1	0_0
S033	Shanxi_China	Purple	1	0_0
S034	Shanxi_China	Purple	1	0_0
S035	Guangdong_China	Purple	1	0_0
S036	Guangdong_China	Green	0	1_1
S037	Shanxi_China	Green	0	1_1
S038	Guangdong_China	Purple	0	0_0
S039	Guangdong_China	Green	0	0_0
S040	Vietnam	Purple	0	0_0
S041	France	Green	0	0_0
S042	Guangdong_China	Purple-Green	1	0_0
S043	Malaysia	White-Green	0	0_0
S044	Malaysia	Purple	0	0_0
S045	Malaysia	Purple	1	0_0
S046	Guangdong_China	Purple	1	0_0
S047	Guangdong_China	Purple	1	0_0
S048	Guangdong_China	Purple	1	0_0
S049	Guangdong_China	Purple	1	0_0
S050	Guangdong_China	Purple	0	0_0
S051	Guangdong_China	Purple	1	0_0
S052	Guangdong_China	Purple	1	0_0
S053	India	Purple	1	0_0
S054	India	Green-White	0	0_0
S055	India	Purple	0	0_0
S056	Vietnam	Purple	0	9_9
S057	Netherlands	White	0	1_1
S058	Guangdong_China	Purple	1	0_0
S059	Guangdong_China	Purple	1	0_0
S060	Guangdong_China	Purple-Green	1	0_0
S061	Hongkong_China	Purple	1	0_0
S062	Guangdong_China	Green	0	1_1
S063	Guangdong_China	Purple	1	0_0
S064	Guangdong_China	Purple	0	0_0
S065	Shanxi_China	Green	0	1_1
S066	Indonesia	Green	0	1_1
S067	Anhui_China	Purple	1	0_0
S068	Guangdong_China	Purple	1	0_0
S069	Guangdong_China	Purple	1	0_0
S070	Malaysia	Purple	0	0_0
S071	Malaysia	Purple	0	0_0
S072	Guangdong_China	Purple	0	0_0
S073	Shanxi_China	Purple	1	0_0
S074	Unknown	Purple	0	0_0
S075	South_America	Purple	0	0_0
S076	Guangdong_China	Purple	1	0_0
S077	Guangdong_China	Green	0	0_0
S078	Guangdong_China	Purple	0	0_0
S079	Guangdong_China	White	0	1_1
S080	Guangdong_China	Purple	1	0_0
S081	Guangdong_China	Purple	1	0_0
S082	Guangdong_China	Purple	1	0_0
S083	Hainan_China	Purple	1	0_0
S084	Guangdong_China	Purple	0	0_0
S085	Malaysia	Purple	0	0_0
S086	Hainan_China	Purple	0	0_0
S087	Guangdong_China	Purple	0	0_0
S088	Guangdong_China	Purple	1	0_0
S089	Guangdong_China	Purple	1	0_0
S090	Guangdong_China	Purple	0	0_0
S091	South_America	Purple	0	0_0
S092	South_America	Purple	1	0_0
S093	Guangdong_China	Purple	1	0_0
S094	Guangdong_China	Green	0	0_0
S095	Guangdong_China	Green	1	0_0
S096	Guangdong_China	White	0	0_0
S098	Guangdong_China	Green	0	0_9
S099	Hebei_China	White	0	1_1
S100	Guangxi_China	White	0	1_1
S101	Guangdong_China	Purple	1	0_0
S102	Guangdong_China	Purple	1	0_0
S103	Guangdong_China	Purple	1	0_0
S104	Guangdong_China	Purple	1	0_0
S105	Shanxi_China	Purple	1	0_0
S106	Guangdong_China	Purple	1	0_0
S107	Shanxi_China	Purple	0	0_0
S108	Shanxi_China	Purple	1	0_0
S109	Shanxi_China	Purple	1	0_0
S110	Guangdong_China	Green	0	1_1
S111	Unknown	White	0	1_1
S112	Thailand	Purple	1	0_0
S113	Guangdong_China	Purple	1	0_0
S114	Zhejiang_China	Purple	1	0_0
S115	Guangdong_China	Purple	1	0_0
S116	Gansu_China	Purple	1	0_0
S117	Gansu_China	Purple	1	0_0
S118	Taiwan_China	Purple	1	0_0
S119	Unknown	Purple	1	0_0
S120	Thailand	Purple	1	0_0
S121	Guangdong_China	Purple	1	0_0
S122	Unknown	Purple	1	0_0
S123	Unknown	Purple	1	0_0
S124	Unknown	Purple	1	0_0
S125	Hunan_China	Purple	1	0_0
S126	Hainan_China	Green	0	1_1
S127	Hainan_China	Purple	1	0_0
S128	Singapore	Purple	0	0_0
S129	Jiangsu_China	Purple	1	0_0
S130	Anhui_China	Purple	0	9_9
S131	Anhui_China	White	0	1_1
S132	Shandong_China	Purple	1	0_0
S133	Shandong_China	Purple	1	0_0
S134	Fujian_China	Purple	1	0_0
S135	Fujian_China	Purple	1	0_0
S136	Guangdong_China	Purple	1	0_0
S137	Guangdong_China	Purple	1	0_0
S138	Guangdong_China	Green	1	0_0
S139	Guangdong_China	Purple	1	0_0
S140	Guangdong_China	Purple	1	0_0
S141	Guangxi_China	Purple	1	0_0
S142	Guangxi_China	Purple	0	9_9
S143	Guizhou_China	Purple	1	0_0
S144	Guizhou_China	Purple	1	0_0
S145	Hebei_China	White	0	9_9
S146	Heilongjiang_China	Purple	1	0_0
S147	Hunan_China	Purple	0	9_9
S148	Hunan_China	Purple	1	0_0
S149	Hunan_China	Purple	1	0_0
S150	Hunan_China	Purple	1	0_0
S151	Jiangsu_China	Purple	1	0_0
S152	Liaoning_China	Purple	1	0_0
S153	Japan	Purple	0	0_0
S154	Sichuan_China	Purple	1	0_0
S155	Sichuan_China	Purple	1	0_0
S156	Sichuan_China	Purple	1	0_0
S157	Fujian_China	Purple	1	0_0
S158	Heilongjiang_China	Purple	1	0_0
S159	America	Purple	1	0_0
S160	Taiwan_China	Purple	1	0_0
S161	Jilin_China	Purple	1	0_0
S162	Jiangsu_China	Purple	1	0_0
S163	Unknown	Purple	0	0_0
S164	South_America	Purple	0	0_0
S165	South_America	Purple	0	0_0
S166	South_America	Purple	0	0_0
S167	South_America	Purple	0	0_0
S168	South_America	Purple	0	0_0
S169	South_America	Purple	0	0_0
S170	Anhui_China	Purple	1	0_0
S171	South_America	Purple	0	0_0
S172	South_America	Green	0	0_0
S173	South_America	Green	0	0_0
S174	South_America	Purple	1	0_0
S175	Guangdong_China	Purple	1	0_0
S176	Guangdong_China	Purple	1	0_0
S177	Guangdong_China	Purple	1	0_0
S178	Guangdong_China	Purple	1	0_0
S179	Guangdong_China	Green	0	1_1
S180	Guangdong_China	White	0	0_0
S181	Guangdong_China	White	0	0_0
S182	Guangdong_China	White	0	1_1
S183	Guangdong_China	Green	1	0_0
S184	Thailand	White	0	0_0
S185	Netherlands	Green	0	0_0
S186	Guangdong_China	Green	0	1_1
S187	Guangdong_China	White	0	1_1
S188	France	Purple	1	0_0
S189	Guangdong_China	White	0	1_1
S190	Unknown	Purple-Green	1	0_0
S191	Thailand	Green	0	1_1
S192	Thailand	Green	0	0_0
S193	Guangdong_China	Purple	0	0_0
S194	Guangdong_China	Green	1	0_0
S195	Guangdong_China	Purple	1	0_0
S196	Guangdong_China	Purple	1	0_0
S197	Guangdong_China	White	0	1_1
S200	Tianjin_China	Purple	1	0_0
S203	Guangdong, China	White	0	1_1
S204	Zhejiang, China	Purple	1	0_0
S205	Guangxi, China	Purple	1	0_0
S206	Italy	Purple	1	0_0

## Sheet: TableS9
Supplementary Table 9. Candidate genes and variations associated with fruit color identified by SNP-GWAS, InDel-GWAS, and SV-GWAS.
VariantID	Variant type	Ref allele	Alt allele	p value	-Log10(p value)	Chromosome	Start	End	Number of SNPs in candidate region	associated candidate genes	Number of SNPs in candidate gene region	Reference genome
Chr03_84463625	SNP	C	T	5.44597e-07	6.26392	3	84063625	84863625	1	evm.model.Chr03.2364	0	S076
Chr05_78862082	SNP	C	A	7.67743e-07	6.11478	5	78462082	79262082	1	evm.model.Chr05.2188	1	S076
Chr05_82567308	SNP	C	T	4.40939e-07	6.35562	5	82167308	82967308	1	evm.model.Chr05.2411	1	S076
Chr05_81641732	SV	CAATGTCATGGAATTGGGCAACAACAACAACAACAACATACCCAGTAAAATCCCACAAGTGGAGTCTGAGAAGGGTAAAATGTACGCAGACCTTATCACTACCTAAGTAGAGAAACTGTTTCCTGGGAACCCTCATCTCAA	C	1.16989e-27	26.9319	5	80641732	82641732	2		0	S076
Chr06_91870551	SNP	A	C	8.09492e-08	7.09179	6	91470551	92270551	1	evm.model.Chr06.3073	0	S076
Chr06_91020166	SV	AGATCAAGCTAAAGTGTATGCTTCCAAACTCCCAAATCAAGCCAAAGTTTATCTCTCCAAAATCCCTGATCAAGCTAAGGTCTACACAACCAGAATCCC	G	2.55121e-12	11.5933	6	90020166	92020166	1		0	S076
Chr07_97711723	SNP	T	C	3.07109e-09	8.51271	7	97311723	98111723	1	evm.model.Chr07.1783	1	S076
Chr07_98815251	SV	AACAAATCAATGTGAGCAAGAAGTTCAAAAGTTGATTTATTTGCAAAGTGTTGCAAATCAACTGTTGGATCCATTTACTAACCTAAGGGTTACAAAATCGCATATTCCAGCTGTTAATGCCTATTTCAAGTTGATGTTGTTGACACCAAATTTTTACCCTCCACAATACAAATTATCTGATTTATTTATTTTAATAATTTTAAAATATTTATCTATTTTTATTAAAAAAATTTAATCCCGCACGTGGGGGTCATGCGCCCCCAATCCCCTTTATTTCTTTCTCCTTCACGCATAAACCCTTCCCCTTCCCCAATTTTCCTTTTCTTCTCTATTCTCCCTGCACTCTCACTCTCCCTCTTCTCTCTCTTCTTCTTCTTCCCAAAACCAAACCCCAAAACC…	A	1.35338e-06	5.86858	7	97815251	99815251	1		0	S076
Chr08_91629005	SV	TATTTGTGTCACGACCCAATTTACGGGTCGTGACTAACACCCGAGGGGGGTGTCCAGAGCATACAACCAAAGCATATACACATAATAGTTTCAGAAAAAGTACTATTCATTTTAGAAAAATTTCGCCAGAGTTTCCTCTGTTTTAGTGACTAGCCACCTGAAAAAGAAAACAGCAGCGAACCCAGAGAATCACAGAACACATATAACAGATATATACGCGGGCCGACAAGGTCACCGCTGCGGTCCTGCCGCCTAGTAACAGATCATATACAGATAGTAGTCATATAGGTGGCTTAGTCTCCCCATTCAACATATACACATGACAGACAGACCAGATACATGGACCCATACACACGACATGTCCACAGACCTCTAAACATATACATACAGAAGCAAACG…	A	7.72271e-15	14.1122	8	90629005	92629005	1	evm.model.Chr08.2544	1	S076
Chr10_72701696	SNP	A	T	2.21392e-13	12.6548	10	72301696	73101696	75	evm.model.Chr10.2098	0	S076
Chr10_72411150	InDel	GAAAAA	GAAAA	8.21152e-06	5.08558	10	72011150	72811150	14		1	S076
Chr10_73048131	SV	AATGAGCTAAAAATTCTCTAAACTTACACTAAGTGAATTGGGTCATAGAAATACTATACAACTTATGCAGGATAATTTGATTCCTGCAGAACTTATGTCGATGGAAGCAAAATTTCTTAATACTTATGCCGCGAGATTAAGCCAAATATATGTATATATTTACTTAAAGATTTAAATAAATGGGGTTTAATTATAAAATGTATTTGTAGATATCAAATATTACCAACTTCTCAACAAACATGTTTCAATATCCCATGTATTTTATTGGAAATATATACATACATAACAAG	AG	5.15569e-07	6.28771	10	72048131	74048131	4		0	S076
Chr10_80505559	SNP	T	C	1.13325e-42	41.9457	10	80105559	80905559	97	evm.model.Chr10.2473.1; evm.model.Chr10.2464	0;17	S076
Chr10_80519453	InDel	TGCTAGA	T	5.25384e-25	24.2795	10	80119453	80919453	13	evm.model.Chr10.2473.1; evm.model.Chr10.2464	0; 4	S076
Chr10_84059757	SNP	T	C	1.98201e-09	8.70289	10	83659757	84459757	2	evm.model.Chr10.2780	0	S076
Chr11_4462275	SV	TGGGCAATTGGGTCGCTAACCATGCTATGCATGCATTAAATCCCTTTGCATTAGGTAT	T	6.82457e-10	9.16592	11	3462275	5462275	1	evm.model.Chr11.301	0	S076

[truncated: 6 more sheets: TableS10, TableS11, TableS12, TableS13, TableS14, TableS15]
